# Supplementary material for: Lack of chemopreventive effects of P2X7R inhibitors against pancreatic cancer
Source: PubMed Central journal article supplement (PMC5716694; doi:10.18632/oncotarget.22085), 2017-10-26
Supplement: oncotarget-08-97822-s001.pdf [file oncotarget-08-97822-s001.pdf]

# Lack of chemopreventive effects of P2X7R inhibitors against pancreatic cancer

## SUPPLEMENTARY MATERIALS

A.

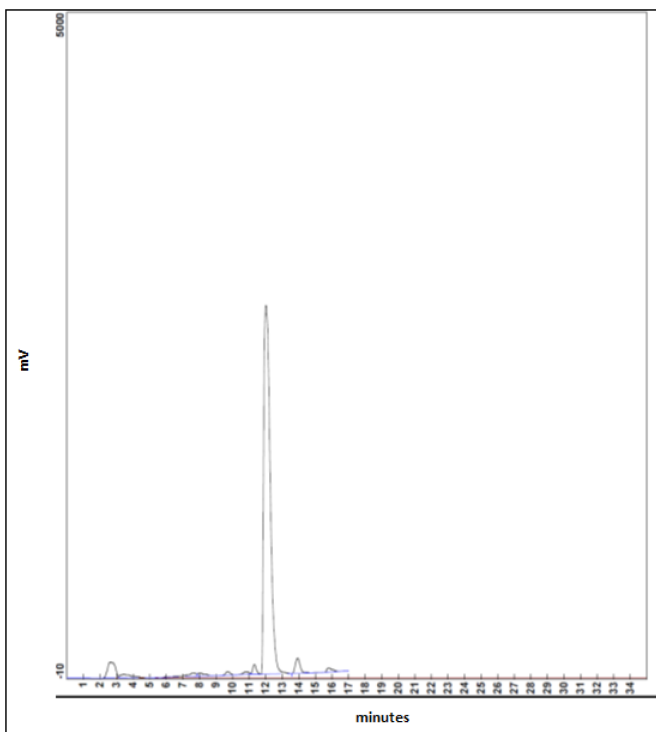

B.

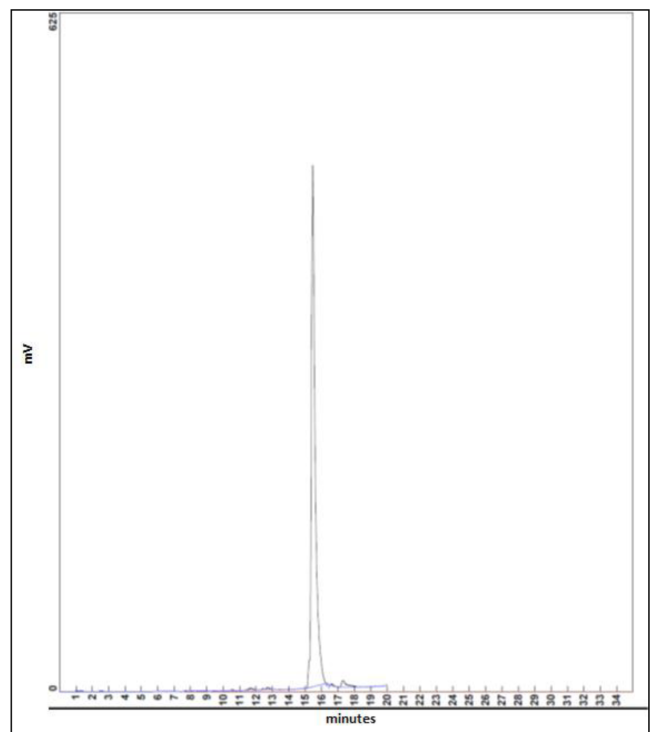

Supplementary Figure 1: (A–B) Purity analysis of A438079 (A) and AZ10606120 (B) by HPLC.

**Supplementary Table 1: List of primers for determining mRNA expression in the pancreatic tumors**

---

|          |                                 |
|----------|---------------------------------|
| Il33 F   | 5'-TGAGACTCCGTTCTGGCCTC-3'      |
| Il33 R   | 5'-CTCTTCATGCTTGGTACCCGAT-3'    |
| Casp3 F  | 5'-GGCTTGCCAGAAGATAACCGGT-3'    |
| Casp3 R  | 5'-GCATAAATTCTAGCTTGTGCGCGTA-3' |
| Casp1 F  | 5'-AGATGCCCACTGCTGATAGG-3'      |
| Casp1 R  | 5'-TTGGCACGATTCTCAGCATA-3'      |
| PCNA F   | 5'-TAAAGAAGAGGAGGCGGTAA-3'      |
| PCNA R   | 5'-TAAGTGTCCCATGTCAGCAA-3'      |
| Tp53 F   | 5'-TGAAACGCCGACCTATCCTTA-3'     |
| Tp53 R   | 5'-GGCACAAACACGAACCTCAAA-3'     |
| NLRP1a F | 5'-ATGTGGACCCAACCTTCAA-3'       |
| NLRP1a R | 5'-GTACGTGCTCCTGGAAAGGT-3'      |
| NLRP1b F | 5'-CCCAGCACAAAGACTCCACTT-3'     |
| NLRP1b R | 5'-CCAACCACCATGTGACTCTG-3'      |
| NLRP2 F  | 5'-GACGTCCTGAGAAAGCTGGA-3'      |
| NLRP2 R  | 5'-GGTCCATTGTCAGCTTGTTG-3'      |
| NLRP6 F  | 5'-GCAGACGAGCTGCCTACTTT-3'      |
| NLRP6 R  | 5'-GTCCTGGTAACAGCTCCTG-3'       |
| P2X7R F  | 5'-GCACGAATTATGGCACCGTC-3'      |
| P2X7R R  | 5'-CCCCACCCTCTGTGACATTCT-3'     |
| p21 F    | 5'-CGAGAACGGTGGAACCTTGAC-3'     |
| p21 R    | 5'-TCCCAGACGAAGTTGCCCT-3'       |

---
